# Supplementary material for: LYN expression predicts the response to dasatinib in a subpopulation of lung adenocarcinoma patients
Source: PubMed Central journal article supplement (PMC5347739; doi:10.18632/oncotarget.12657), 2016-10-14
Supplement: oncotarget-07-82876-s001.pdf [file oncotarget-07-82876-s001.pdf]

# LYN expression predicts the response to dasatinib in a subpopulation of lung adenocarcinoma patients

## SUPPLEMENTARY FIGURES AND TABLES

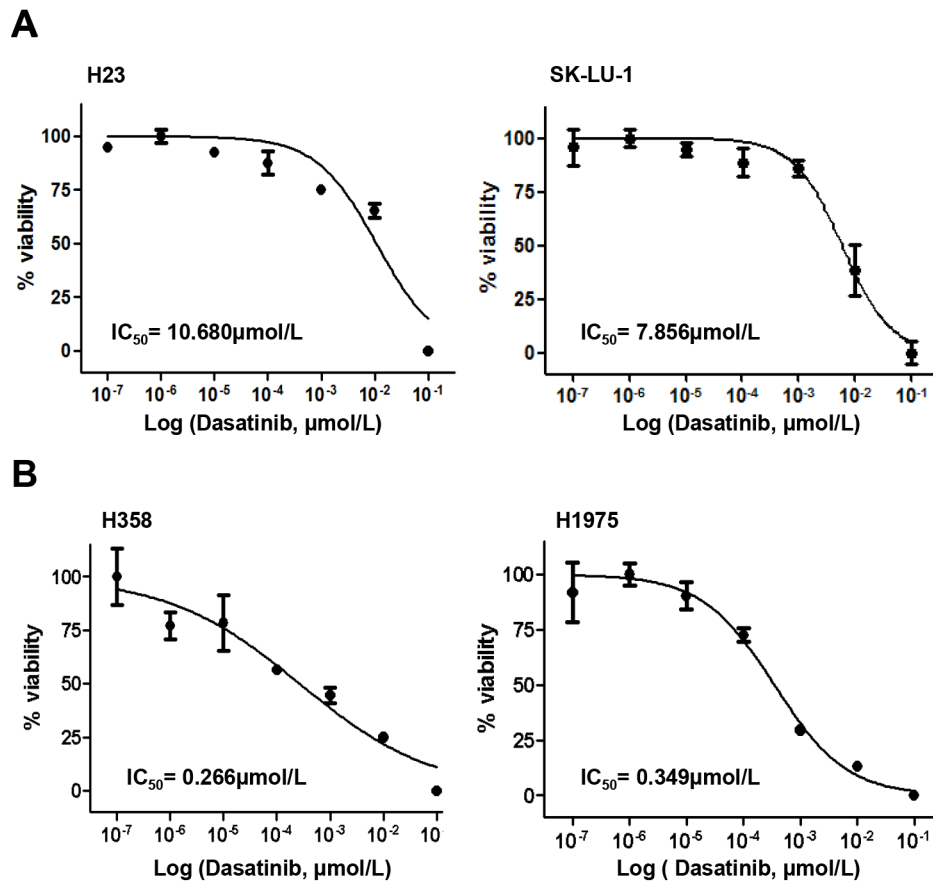

**Supplementary Figure S1: Dasatinib inhibits viability of lung ADC cells expressing high levels of LYN.** Inhibitory effects of dasatinib on cell viability were assessed by dose-response curves in **A**, low LYN-expressing cells (H23 and SK-LU-1) and **B**, high LYN-expressing cells (H358 and H1975). IC<sub>50</sub> values were calculated based on fits using sigmoidal curves (n = 3).

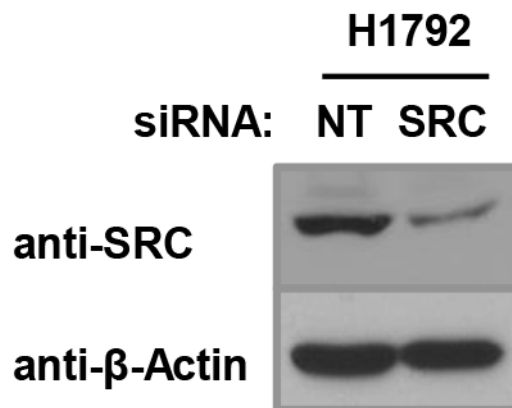

**Supplementary Figure S2: Specificity of the SRC antibody (32G6 clone) is confirmed by western blot analysis using siRNA.** Knockdown of SRC by siRNAs was confirmed by western blot analysis in H1792 cells. NT, non-targeting.

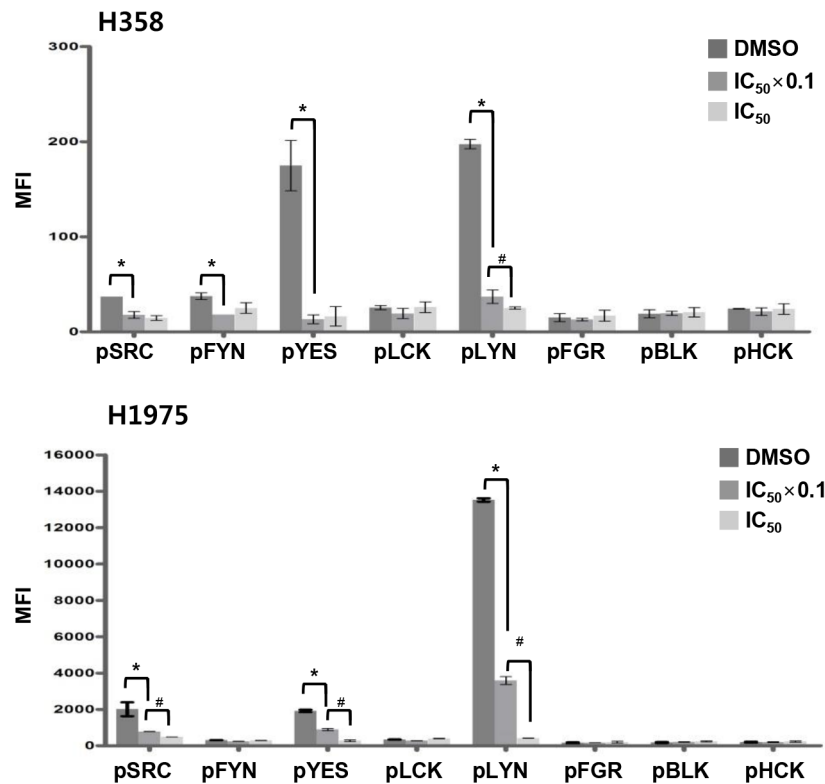

**Supplementary Figure S3: LYN might be a major target for dasatinib in LYN-positive lung ADC cells.** Tyrosine phosphorylation levels of activated SFKs were quantified in dasatinib-treated H358 and H1975 cells using ELISA. Cells were treated with dasatinib at 2 varying concentrations (DMSO as control, and IC<sub>50</sub> × 0.1, and IC<sub>50</sub>). The MFI values indicate the level of phospho-Tyr of SFKs (n = 3; Bars, SE; \*, *P* < 0.05 vs. DMSO; #, *P* < 0.05 vs. IC<sub>50</sub> × 0.1).

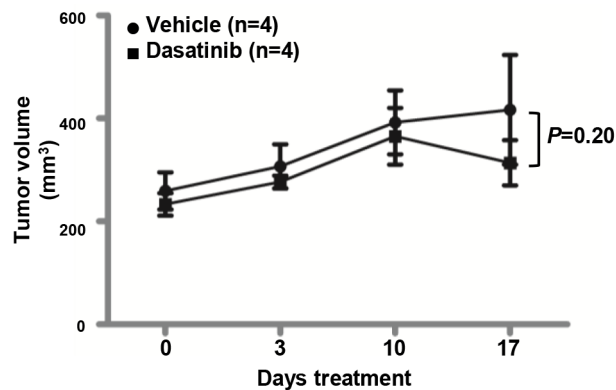

**Supplementary Figure S4: Dasatinib did not inhibit the growth of LYN-negative lung ADC xenografts.** H23 cells were injected subcutaneously into nude mice. Dasatinib treatment for H23 xenografts were initiated when the average tumor size reached ~200 mm<sup>3</sup>. Dasatinib was intraperitoneally injected for 2 weeks at a dosage of 10 mg·kg<sup>-1</sup>·day<sup>-1</sup>.

**Supplementary Table S1: Clinicopathologic features of NSCLC patients according to the LYN expression status**

| Variable Category | No (%)    | LYN (+) (%)<br>n=227(50.9) | LYN (-) (%)<br>n=219(49.1) | <i>P</i> |
|-------------------|-----------|----------------------------|----------------------------|----------|
| Sex               |           |                            |                            | 0.293    |
| Male              | 360(80.7) | 186(81.9)                  | 174(79.5)                  |          |
| Female            | 86(19.3)  | 41(18.1)                   | 45(20.5)                   |          |
| Age               |           |                            |                            | 0.313    |
| ≥65               | 165(37.0) | 81(35.7)                   | 84(38.4)                   |          |
| <65               | 281(63.0) | 146(64.3)                  | 135(61.6)                  |          |
| Smoking           |           |                            |                            | 0.410    |
| Smoker            | 327(73.3) | 168(74.0)                  | 159(72.6)                  |          |
| Non-smoker        | 119(26.7) | 59(26.0)                   | 60(27.4)                   |          |
| Histology         |           |                            |                            | 0.705    |
| SCC               | 254(57.0) | 126(55.5)                  | 128(58.4)                  |          |
| ADC               | 151(33.8) | 82(35.7)                   | 70(32.0)                   |          |
| Others            | 41(9.2)   | 20(8.8)                    | 21(9.6)                    |          |
| Lymph node        |           |                            |                            | 0.165    |
| Negative          | 286(64.1) | 151(66.5)                  | 135(61.6)                  |          |
| Positive          | 160(35.9) | 76(33.5)                   | 84(38.4)                   |          |
| Stage             |           |                            |                            | 0.605    |
| I                 | 246(55.2) | 130(57.3)                  | 116(53.0)                  |          |
| II                | 102(22.8) | 48(21.1)                   | 54(24.7)                   |          |
| III               | 98(22.0)  | 49(21.6)                   | 49(22.4)                   |          |

SCC, squamous cell carcinoma; ADC, adenocarcinoma; *P*, *p*-value

**Supplementary Table S2: Univariate analysis of prognostic factors for overall survival**

| Variable  | Category           | Univariate |               |          |
|-----------|--------------------|------------|---------------|----------|
|           |                    | HR         | 95% CI        | <i>P</i> |
| Sex       | Male/Female        | 2.055      | 1.360 - 3.105 | 0.001    |
| Age group | ≥65 yr/<65 yr      | 1.505      | 1.137 - 1.992 | 0.004    |
| Smoking   | Smoker /Non-smoker | 1.458      | 1.047 - 2.032 | 0.026    |
| Histology | SCC/ADC            | 1.001      | 0.723 - 1.215 | 0.328    |
| Stage     | III/I+II           | 2.013      | 1.714 - 2.365 | <0.01    |
| LYN       | Positive/Negative  | 1.186      | 0.899 - 1.564 | 0.228    |

HR, hazard ratio; CI, confidence interval

**Supplementary Table S3: Multivariate analysis of prognostic factors for overall survival by NSCLC subgroups**

| Variable  | Category           | Female (n=86) |               |       | Non-smoker (n=119) |               |       |
|-----------|--------------------|---------------|---------------|-------|--------------------|---------------|-------|
|           |                    | HR            | 95% CI        | P     | HR                 | 95% CI        | P     |
| Sex       | Male/Female        | -             | -             | -     | 1.650              | 0.754 - 3.614 | 0.210 |
| Age group | ≥65 yr/<65 yr      | 1.471         | 0.577 - 3.748 | 0.419 | 2.087              | 1.045 - 4.166 | 0.037 |
| Smoking   | Smoker /Non-smoker | 0.406         | 0.073 - 2.244 | 0.406 | -                  | -             | -     |
| Stage     | III/I+II           | 7.855         | 2.256 - 9.354 | 0.001 | 3.083              | 1.326 - 7.171 | 0.009 |
| LYN       | Positive/Negative  | 2.097         | 0.919 - 4.790 | 0.079 | 2.527              | 1.323 - 4.828 | 0.005 |

  

| Variable  | Category           | ADC (n=151) |               |       |
|-----------|--------------------|-------------|---------------|-------|
|           |                    | HR          | 95% CI        | P     |
| Sex       | Male/Female        | 1.825       | 0.859 - 3.880 | 0.118 |
| Age group | ≥65 yr/<65 yr      | 1.372       | 0.827 - 2.278 | 0.221 |
| Smoking   | Smoker /Non-smoker | 1.579       | 0.814 - 3.063 | 0.177 |
| Stage     | III/I+II           | 5.105       | 2.860 - 9.113 | <0.01 |
| LYN       | Positive/Negative  | 1.309       | 0.808 - 2.122 | 0.274 |

**Supplementary Table S4: *LYN* and *EGFR* mutation data in the intersection subgroup (FNA, in Figure 1C).**

See Supplementary File 1

Supplementary Table S5: The raw data and *p*-value corresponding to Figure 2B

| Application                        | H358    |        |                 | H1792  |        |                 | H1975  |        |                 |
|------------------------------------|---------|--------|-----------------|--------|--------|-----------------|--------|--------|-----------------|
|                                    | NT      | LYN    | <i>p</i> -value | NT     | LYN    | <i>p</i> -value | NT     | LYN    | <i>p</i> -value |
| Proliferation (OD <sub>450</sub> ) | 0.6900  | 0.7250 |                 | 0.8904 | 0.7030 |                 | 0.6658 | 0.5633 |                 |
|                                    | 0.6900  | 0.7750 | 0.069           | 1.0438 | 0.7073 | 0.002           | 0.7520 | 0.5527 | 0.002           |
| Migration (OD <sub>570</sub> )     |         |        |                 | 0.9794 | 0.6980 |                 | 0.7118 | 0.5694 |                 |
|                                    | 0.43977 | 0.2807 |                 | 0.0680 | 0.0618 |                 | 0.0617 | 0.0600 |                 |
|                                    | 0.40501 | 0.3568 | 0.007           | 0.0688 | 0.0613 | 0.001           | 0.0625 | 0.0606 | 0.002           |
| Invasion (OD <sub>570</sub> )      | 0.41929 | 0.3166 |                 | 0.0682 | 0.0637 |                 | 0.0623 | 0.0604 |                 |
|                                    | 0.30743 | 0.2822 |                 | 0.0635 | 0.0063 |                 | 0.0770 | 0.0702 |                 |
|                                    | 0.27559 | 0.2641 | 0.062           | 0.0646 | 0.0635 | 0.101           | 0.0767 | 0.0706 | 0.001           |
|                                    | 0.29095 | 0.2484 |                 | 0.0647 | 0.0636 |                 | 0.0769 | 0.0709 |                 |

Supplementary Table S6: EGFR mutation status of lung ADC cells from Cancer Cell Line Encyclopedia (CCLE) data analysis

| Cell line | EGFR mutation |
|-----------|---------------|
| H23       | WT            |
| SK-LU-1   | WT            |
| H358      | WT            |
| H1299     | WT            |
| H1703     | WT            |
| H1792     | WT            |
| H1975     | L858R+T790M   |
| HCC1171   | WT            |
| HCC2108   | WT            |

Supplementary Table S7: IC50 values of dasatinib in lung ADC cells

| Cell line | Dasatinib IC <sub>50</sub> (μmol/L) | Response                |
|-----------|-------------------------------------|-------------------------|
| H23       | 10.68                               | Resistant (>0.6 μmol/L) |
| SK-LU-1   | 7.856                               | Resistant               |
| H358      | 0.266                               | Sensitive               |
| H1299     | 0.236                               | Sensitive               |
| H1703     | 0.063                               | Sensitive               |
| H1792     | 0.125                               | Sensitive               |
| H1975     | 0.349                               | Sensitive               |
| HCC1171   | 0.308                               | Sensitive               |
| HCC2108   | 0.067                               | Sensitive               |
